# Supplementary material
Source: MDPI journal article supplement (https://www.mdpi.com/1999-4907/10/8/613)
Supplement: s1 [file s1]

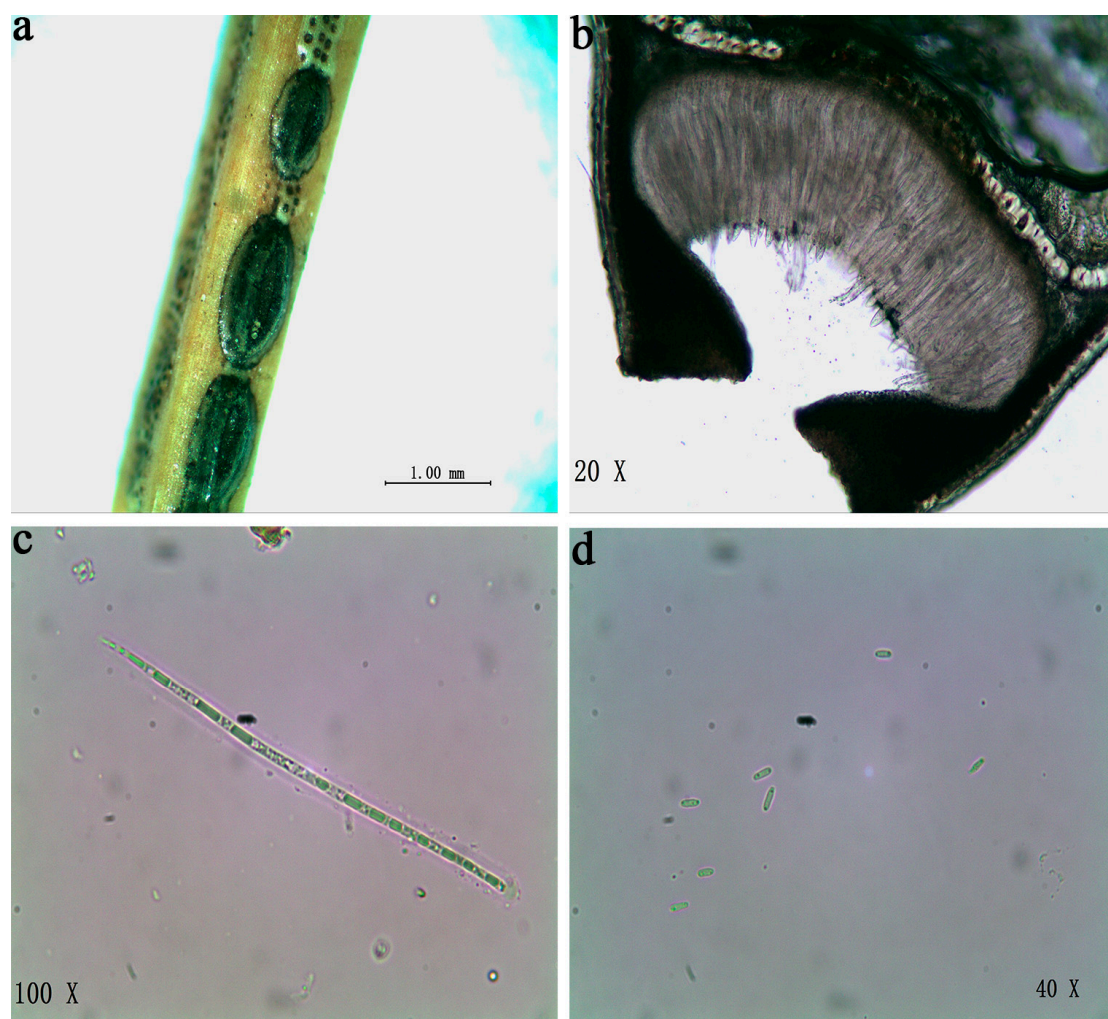

**Figure S1.** The information of pathogen (*Lophodermium piceae*). (a) The ascoma of *L. piceae* on the needle of *Picea asperata*; (b) The transverse section of *L. piceae* ascoma; (c) The ascospore of *L. piceae*; (d) The conidium of *L. piceae*. *L. piceae* characteristic sequence Genbank ID: KX573897.

**Table S1.** The details of the *Picea asperata* collection conditions on a forest farm of Erlang Mountain in Sichuan, China.

| Time of collecting | Precipitation/Annual average | Humidity (%) | Altitude  | Map coordinates (longitude and latitude) | Percentage of needles infected by <i>Lophodermium piceae</i> (%) / The growth rate of infected needles (%) |                             |           |
|--------------------|------------------------------|--------------|-----------|------------------------------------------|------------------------------------------------------------------------------------------------------------|-----------------------------|-----------|
|                    |                              |              |           |                                          | Healthy <i>P. asperata</i>                                                                                 | Infected <i>P. asperata</i> | <i>P.</i> |
| 2018.05.25         | 625.18 mm                    | 64           | 2830.00 m | N:                                       | 0/0                                                                                                        | 45 ± 0.08/0                 |           |
| 2018.07.26         |                              | 47           |           | 25°51'34.66"                             | 0/0                                                                                                        | 52 ± 0.06/15.56             |           |
| 2018.09.25         |                              | 51           |           | E:                                       | 0/0                                                                                                        | 68 ± 0.11/30.77             |           |
| 2018.11.27         |                              | 60           |           | 102°16'30.96"                            | 0/0                                                                                                        | 76 ± 0.18/11.76             |           |
